# Supplementary material
Source: MDPI journal article supplement (https://www.mdpi.com/2073-4395/10/10/1578)
Supplement: s1 [file s1]

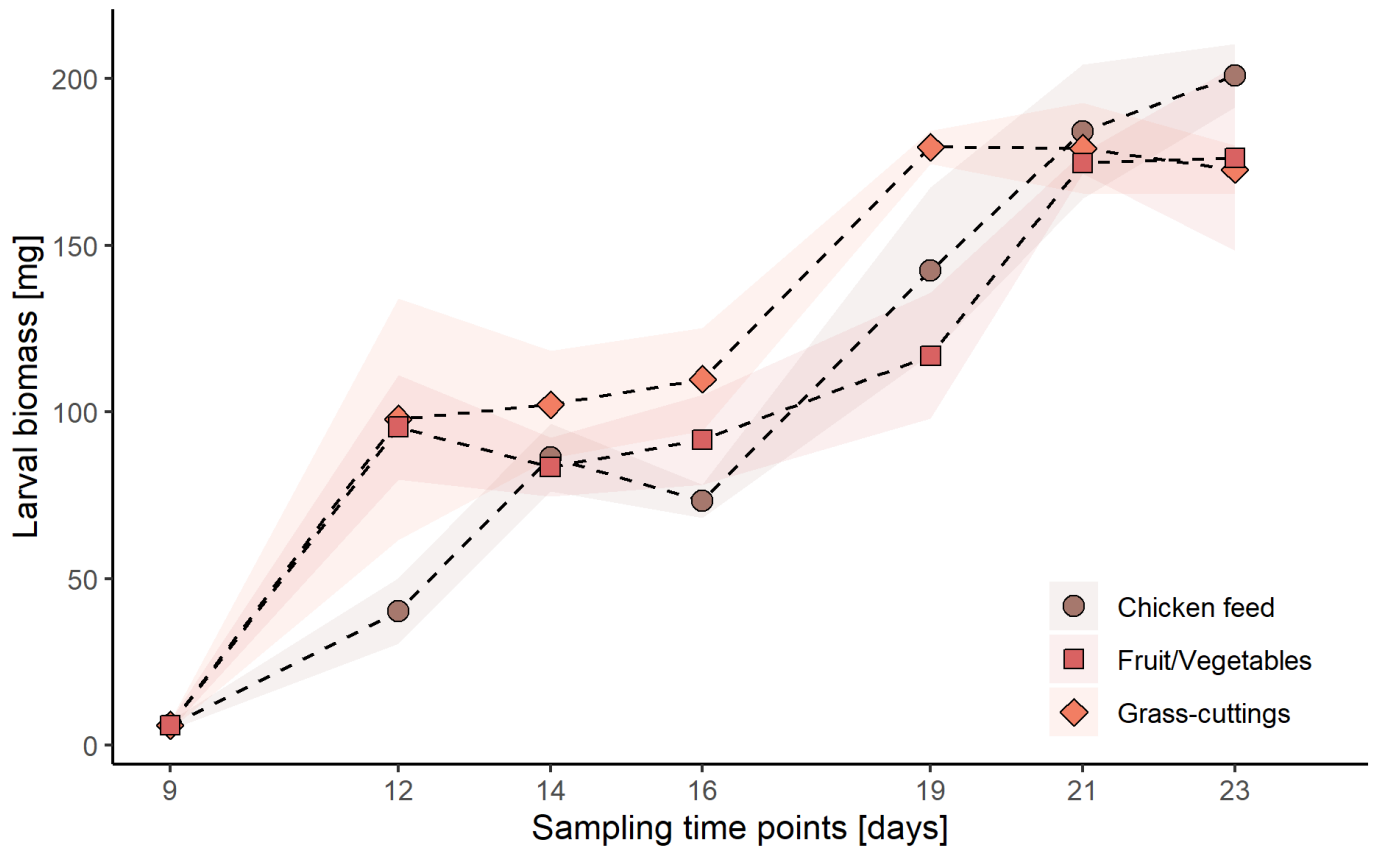

**Figure S1.** Influence of three different diets on larval biomass increase. Larvae were collectively fed with chicken feed until day six. Subsequently, larvae were equally split into separate containers and two new diets (Fruit/Vegetables and Grass-cuttings) were introduced. The experiment was terminated at day 23 post-hatching. (n = 4)

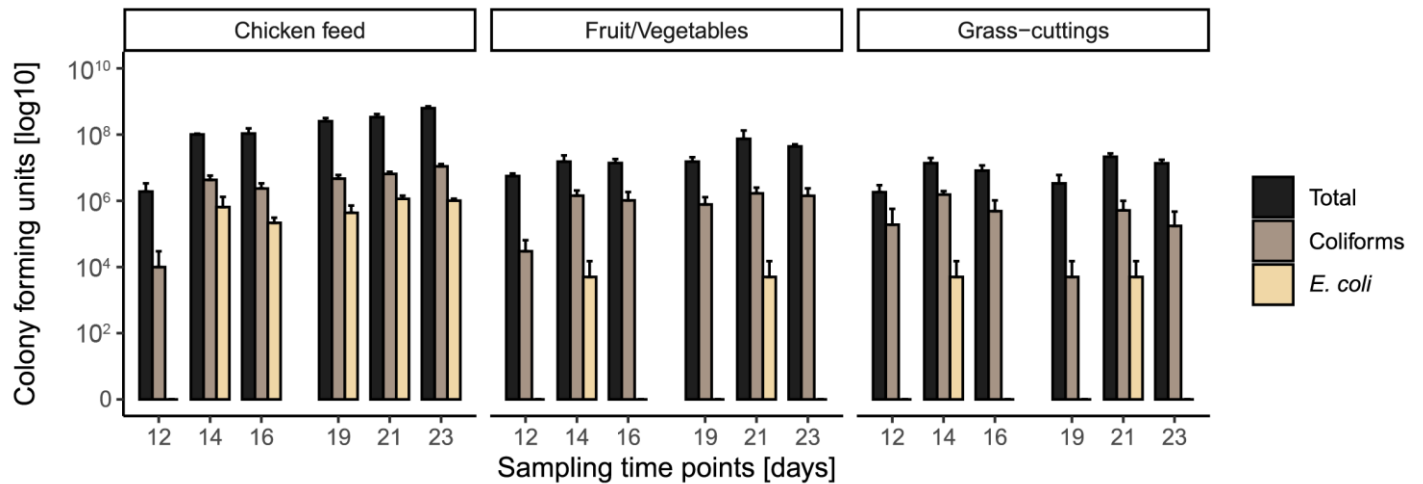

**Figure S2.** Microbial colonization of larval surfaces. Colony forming units counted on standard nutrient agar (total bioburden) and ChromoCult® agar (*E. coli* and other coliform bacteria) from samples collected from larval surfaces. (n = 3)
